# Supplementary material for: Substantial secondary organic aerosol formation in a coniferous forest: observations of both day- and nighttime chemistry
Source: Copernicus journal article supplement (doi:10.5194/acp-16-6721-2016), 2016-06-03
Supplement: Supplementary file 1 [file acp-16-6721-2016-supplement.pdf]

Supplement of Atmos. Chem. Phys., 16, 6721–6733, 2016  
<http://www.atmos-chem-phys.net/16/6721/2016/>  
doi:10.5194/acp-16-6721-2016-supplement  
© Author(s) 2016. CC Attribution 3.0 License.

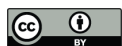

Atmospheric  
Chemistry  
and Physics  
Open Access  
EGU

*Supplement of*

## **Substantial secondary organic aerosol formation in a coniferous forest: observations of both day- and nighttime chemistry**

**Alex K. Y. Lee et al.**

*Correspondence to:* Alex K. Y. Lee ([alexky.lee@utoronto.ca](mailto:alexky.lee@utoronto.ca))

The copyright of individual parts of the supplement might differ from the CC-BY 3.0 licence.

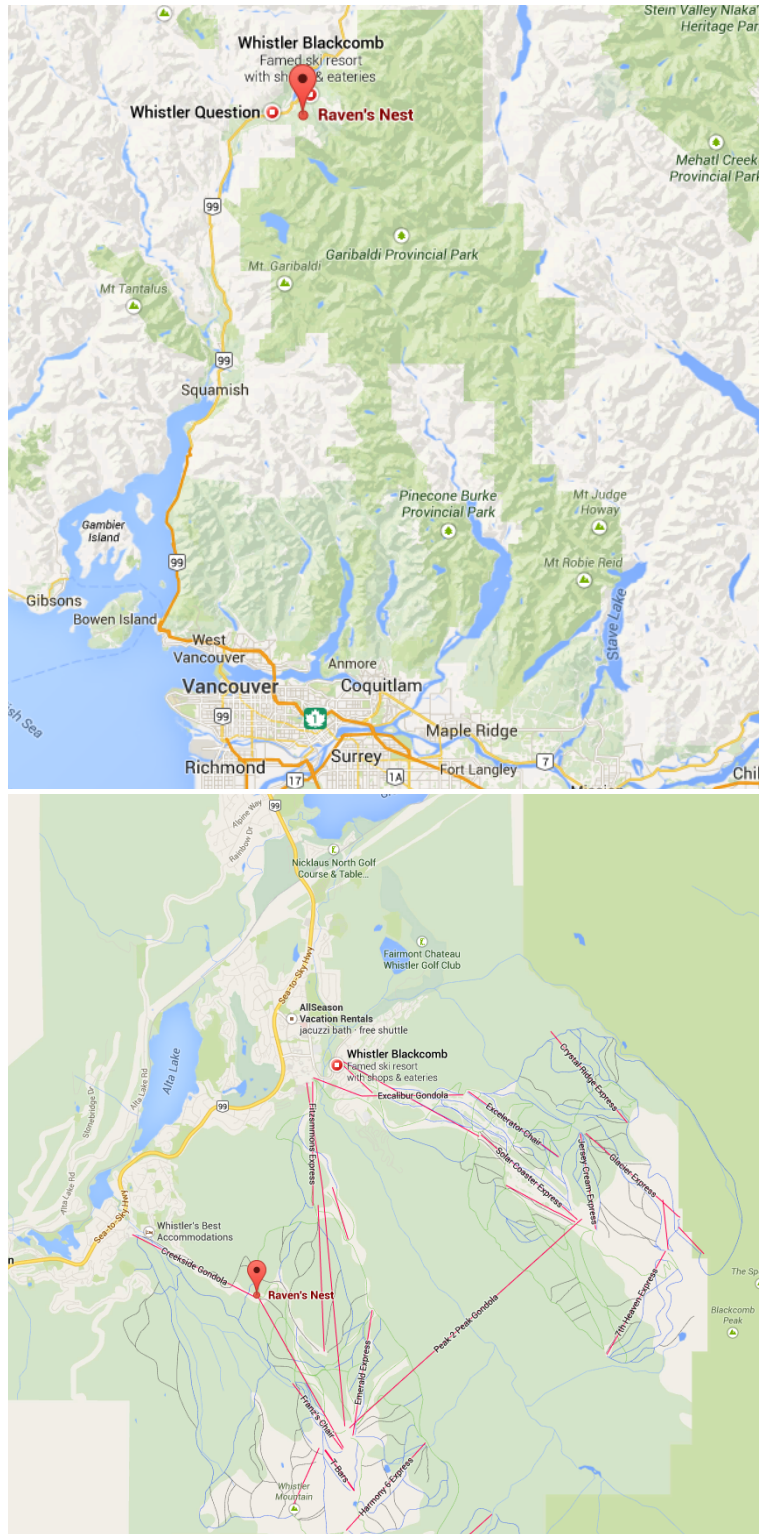

Figure S1: The location of sampling site (Raven's Nest, red marker). The sampling site located with a coniferous forest mountain area at an elevation of 1320 m-asl.

Table S1: List of VOCs observed by the PTR-ToF-MS

| <b>m/z</b> | <b>VOCs</b>                                        | <b>Sensitivity (normalized count per ppb)</b> | <b>Limit of detection (LOD, pptv)</b> |
|------------|----------------------------------------------------|-----------------------------------------------|---------------------------------------|
| 31.018     | Formaldehyde                                       | --                                            | --                                    |
| 33.034     | Methanol                                           | 10.4                                          | 200                                   |
| 42.034     | Acetonitrile                                       | 22.9                                          | 4                                     |
| 47.014     | Formic acid                                        | 17.9                                          | 110                                   |
| 59.049     | Acetone                                            | 30.9                                          | 18                                    |
| 61.033     | Acetic acid + glycoaldehyde                        | --                                            | --                                    |
| 69.070     | Isoprene                                           | 9.9                                           | 9                                     |
| 71.053     | Methyl vinyl ketone (MVK)<br>+ methacrolein (MACR) | 12.6                                          | 9                                     |
| 73.029     | Methyl glyoxal                                     | --                                            | --                                    |
| 73.065     | Methyl ethyl ketone (MEK)                          | --                                            | --                                    |
| 75.044     | Hydroxyacetone                                     | --                                            | --                                    |
| 79.055     | Benzene                                            | 15.0                                          | 4                                     |
| 81.070     | $\Sigma$ monoterpene fragment                      | --                                            | --                                    |
| 87.035     | Propanoic acid                                     | --                                            | --                                    |
| 87.070     | Methyl-3-buten-2-ol (MBO)                          | --                                            | --                                    |
| 93.070     | Toluene                                            | 17.2                                          | 4                                     |
| 107.097    | $\Sigma$ C <sub>8</sub> aromatics                  | --                                            | --                                    |
| 137.133    | $\Sigma$ Monoterpenes                              | 5.6                                           | 9                                     |
| 139.112    | Nopinone                                           | --                                            | --                                    |

### Biogenic period (Period 1)

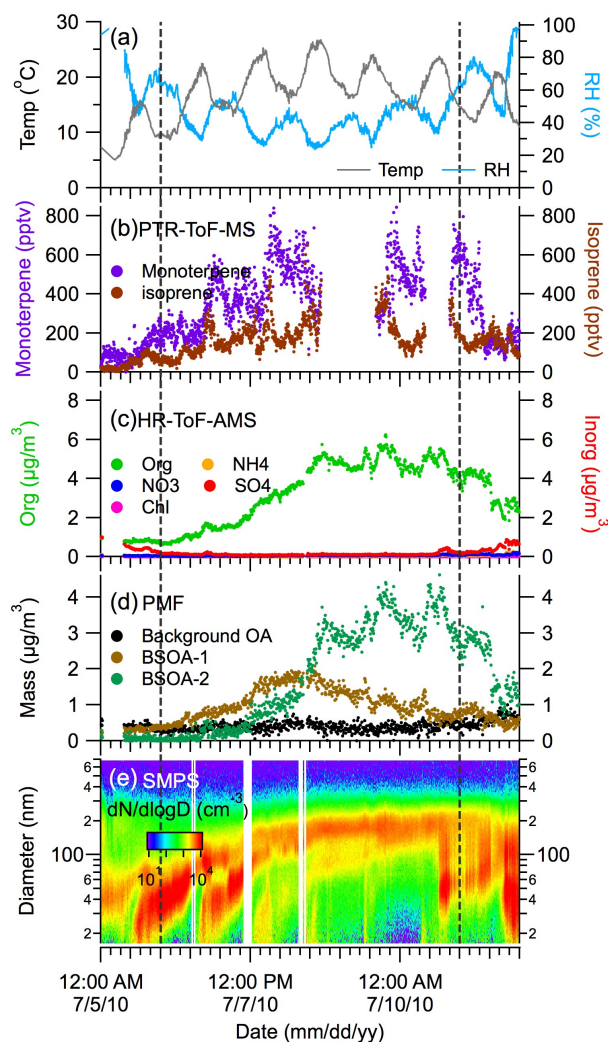

### Period with mixed influence (Period 2)

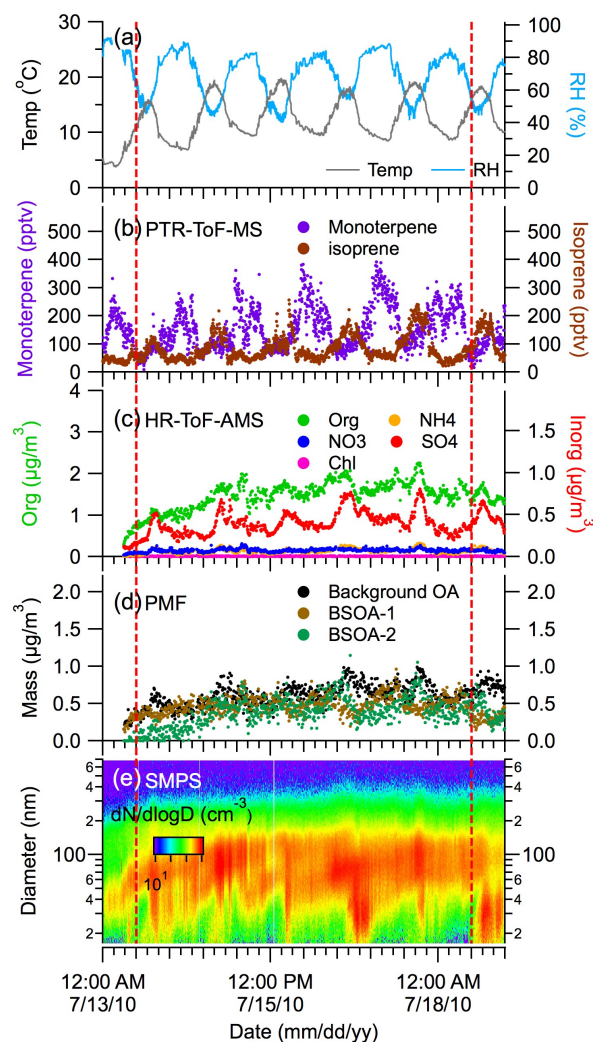

Figure S2: Left panel: biogenic episode (Period 1), right panel: period with a mix of biogenic and regional background influence (Period 2). Time series (PST) profiles of (a) Temperature and relative humidity, (b) monoterpene and isoprene measured by PTR-ToF-MS, c) Organic, nitrate, sulfate, ammonium, and chloride measured by HR-ToF-AMS, (d) background OA, BSOA-1, and BSOA-2 determined by PMF analysis, (e) particle number size distribution measured SMPS.



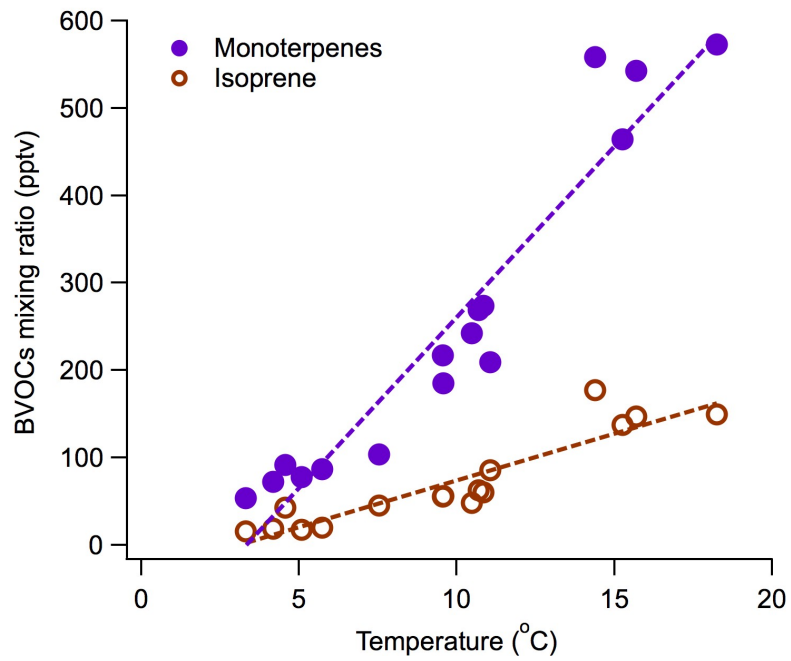

Figure S3: Correlation of BVOC mixing ratios (solid purple circle: monoterpenes, open brown circle: isoprene) and ambient temperature.

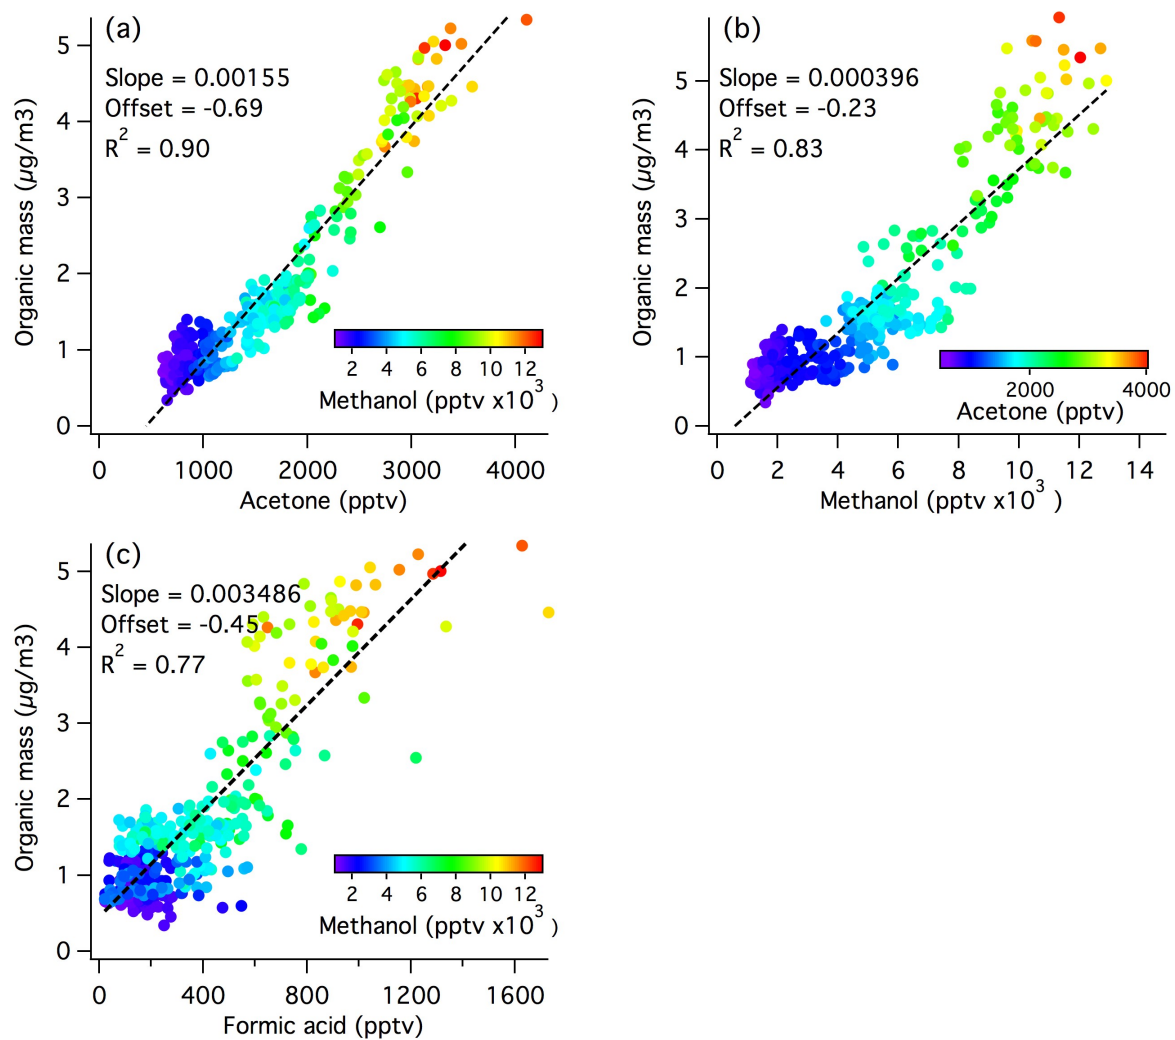

Figure S4: (a) Correlation of organic mass and acetone. The color scale represents the mixing ratio of methanol. (b) Correlation of organic mass and methanol. The color scale represents the mixing ratio of acetone. (c) Correlation of organic mass and formic acid. The color scale represents the mixing ratio of methanol.

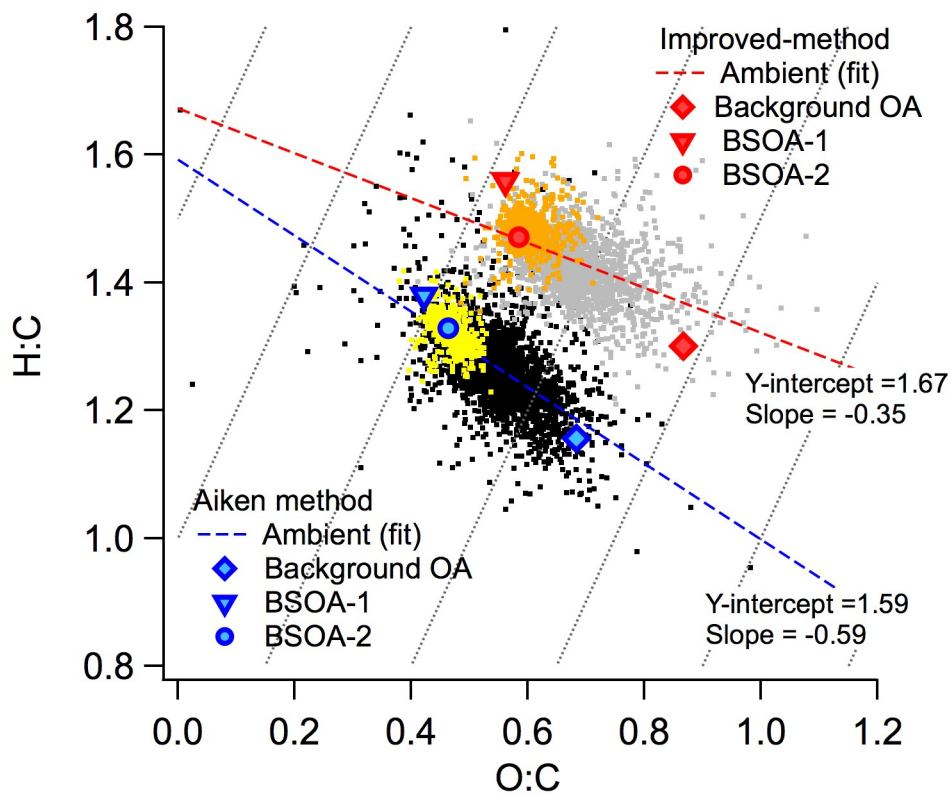

Figure S5: Van-Krevelen diagram: Improved method: orange and gray dots represent observations from the regional biogenic period (July 6-10) and the whole study period, respectively. Red symbols represent PMF factors. Aiken's method: yellow and black dots represent observations from the regional biogenic period and the whole study period, respectively. Blue symbols represent PMF factors.

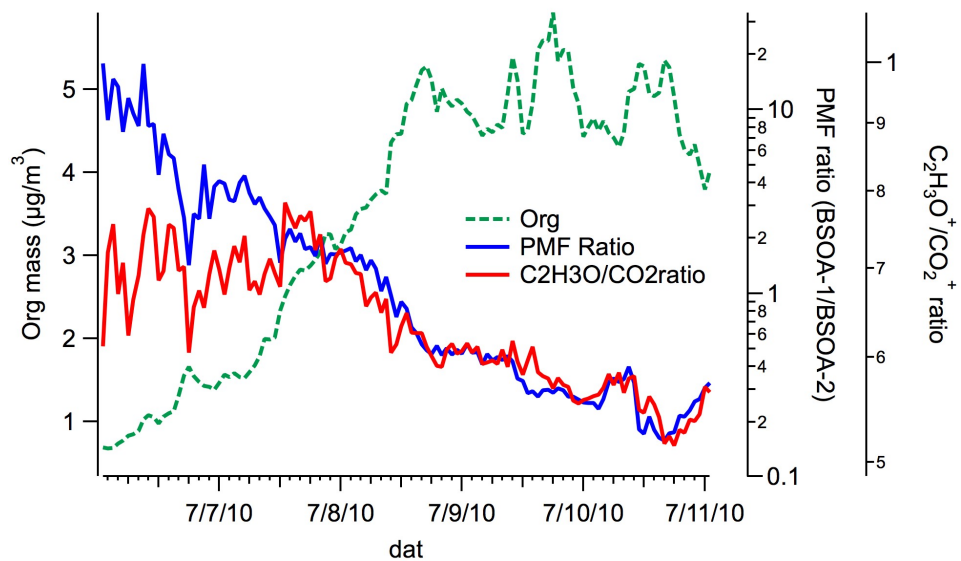

Figure S6: Time series (PST) profiles of total organic mass, BSOA-1/BSOA-2 ratio, and  $C_2H_3O^+$ / $CO_2^+$  ratio during the biogenic period.

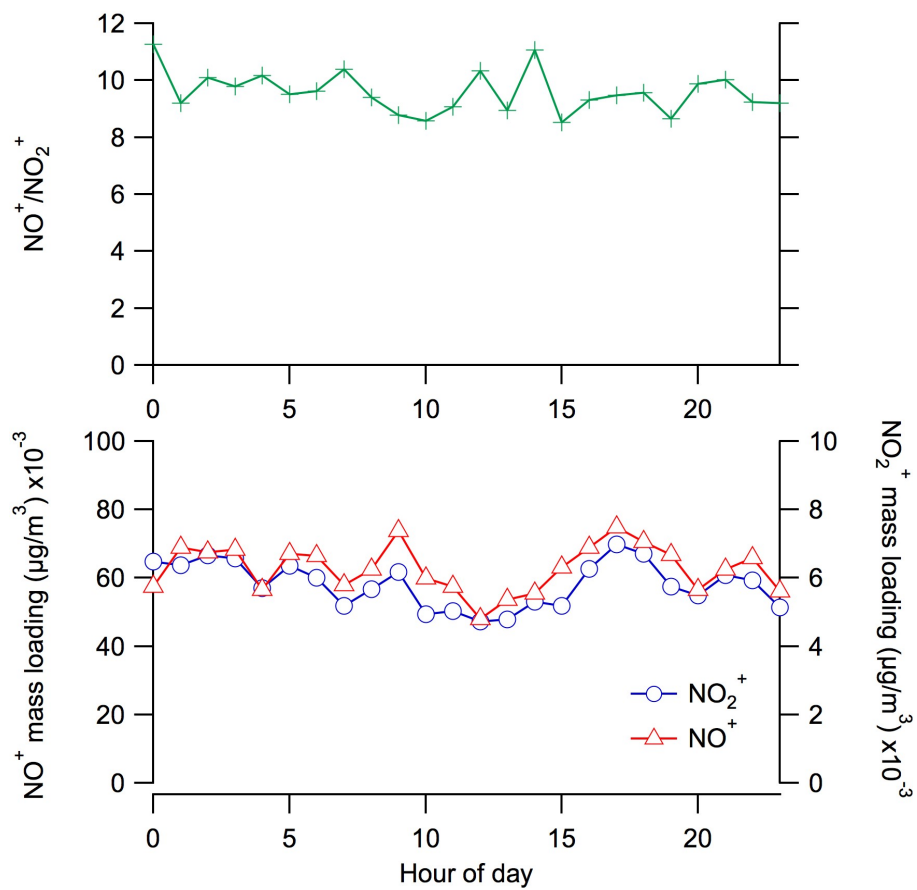

Figure S7: Diurnal patterns of the AMS signals of  $\text{NO}^+$ ,  $\text{NO}_2^+$  and  $\text{NO}^+/\text{NO}_2^+$  during the period with a mix of biogenic and anthropogenic influence.

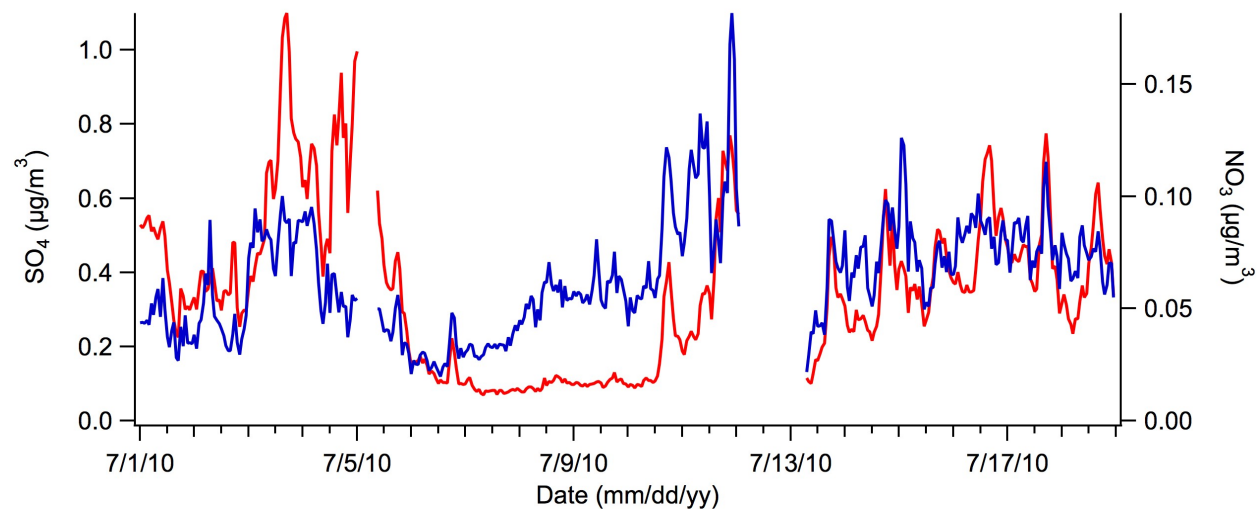

Figure S8: Time series (PST) profiles of nitrate and sulfate during the whole sampling period.



## PMF analysis

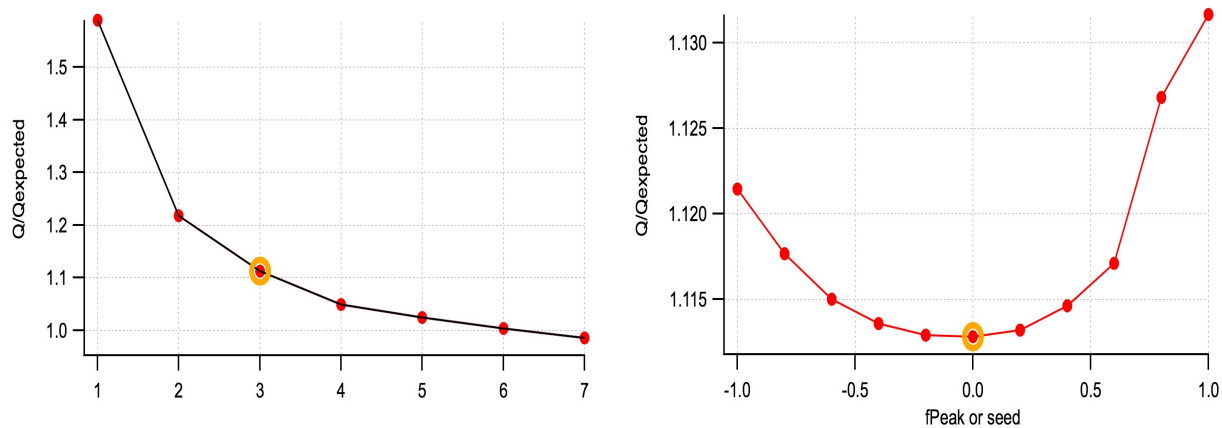

Figure S9: The PMF quality of fit parameter ( $Q/Q_{\text{expected}}$ ) as a function of the number of factors (left) and  $f_{\text{Peak}}$  (right)

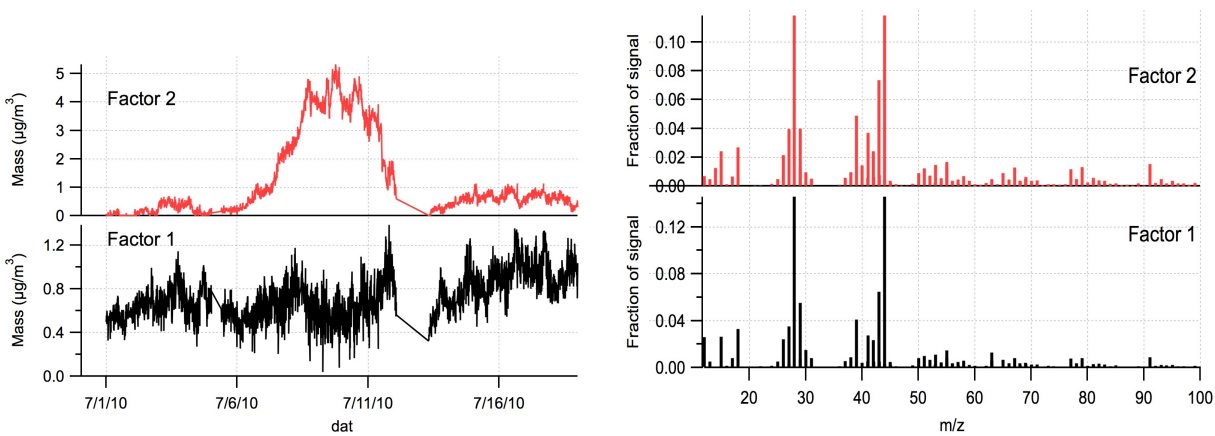

Figure S10: Time series and mass spectra corresponding to the two - factor PMF solution. Organic mass loadings are represented here as nitrate equivalent mass.

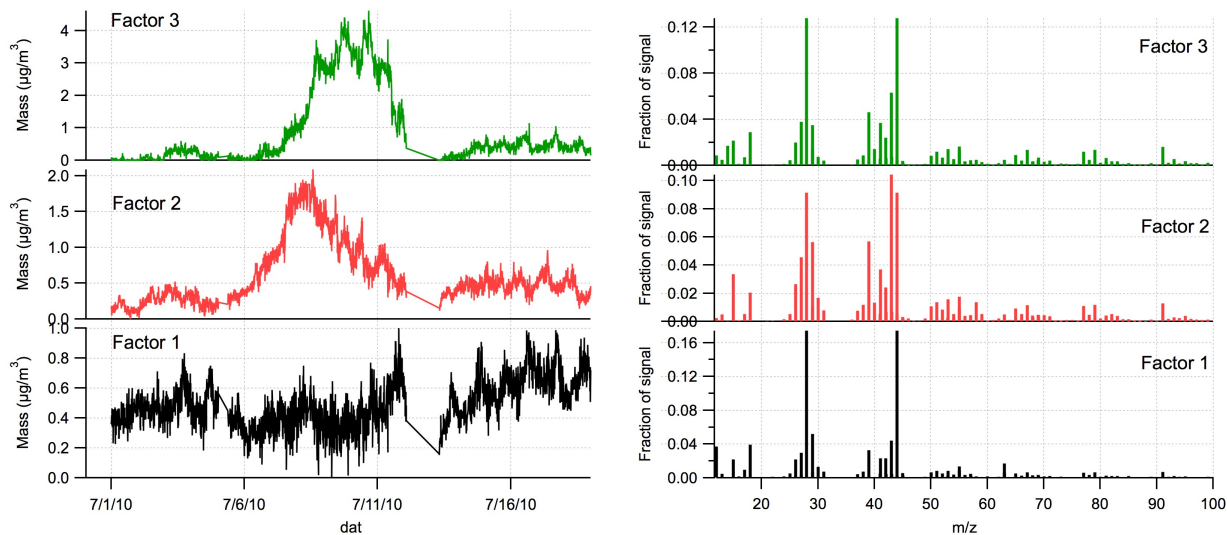

Figure S11: Time series and mass spectra corresponding to the three - factor PMF solution. Organic mass loadings are represented here as nitrate equivalent mass.

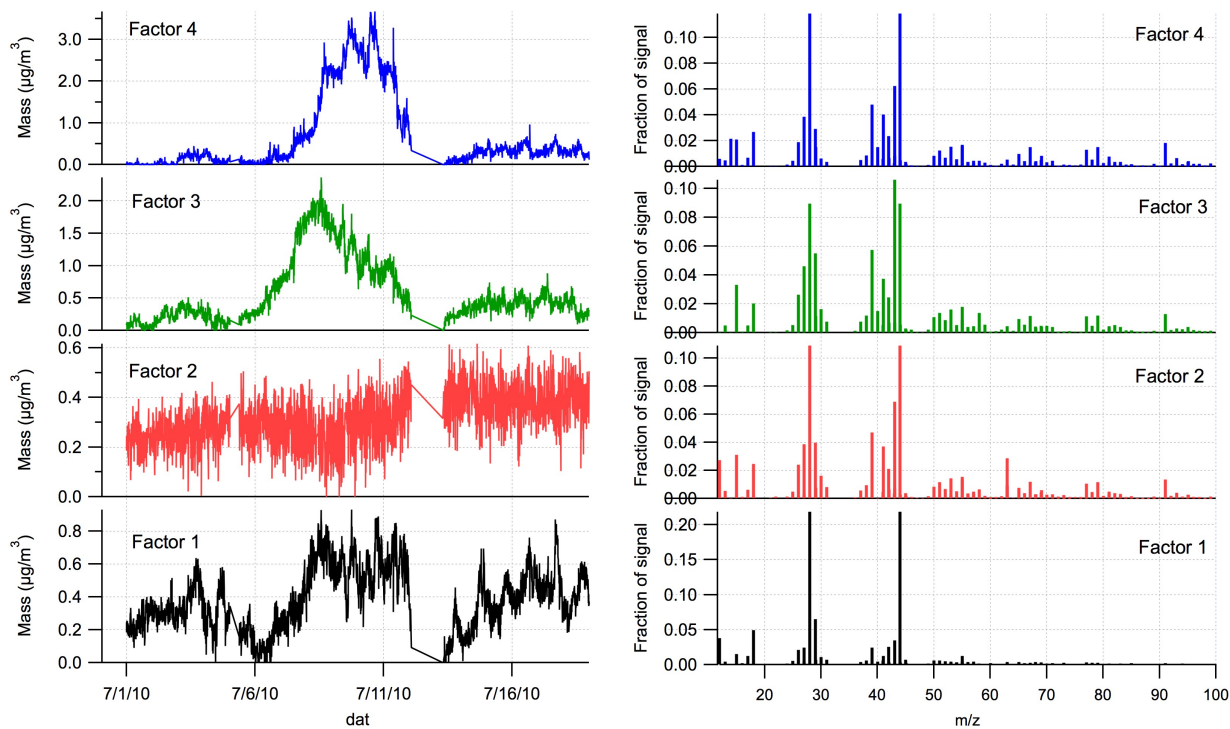

Figure S12: Time series and mass spectra corresponding to the four - factor PMF solution. Organic mass loadings are represented here as nitrate equivalent mass.

### Calculation of organic nitrate mass

The mass concentration of the nitrate functional groups (-ONO<sub>2</sub>) in organic compounds is estimated using the AMS mass concentrations of NO<sup>+</sup> and NO<sub>2</sub><sup>+</sup> followed by the calculation suggested by Xu et al. (2015).

$$[-\text{ONO}_2] = [\text{NO}^+] + [\text{NO}_2^+]$$

where [NO<sup>+</sup>] and [NO<sub>2</sub><sup>+</sup>] are nitrate-equivalent mass concentration of fragment NO<sup>+</sup> and NO<sub>2</sub><sup>+</sup>

The mass concentration of nitrate functional groups in organic compounds is used to estimate the mass concentration of organic nitrates (ON) by the following equation.

$$[\text{ON}] = ([-\text{ONO}_2]/62) \times \text{MW}_{\text{ON}}$$

where MW<sub>ON</sub> is the average molecular weight of organic nitrates, which is assumed to range from 200 to 300 g/mol.

### Reference:

Xu, L., Guo, H., Boyd, C. M., Klein, M., Bougiatioti, A., Cerully, K. M., Hite, J. R., Isaacman-VanWertz, G., Kreisberg, N. M., Knote, C., Olson, K., Koss, A., Goldstein, A. H., Hering, S. V., de Gouw, J., Baumann, K., Lee, S., Nenes, A., Weber, R. J. and Ng, N. L.: Effects of anthropogenic emissions on aerosol formation from isoprene and monoterpenes in the southeastern United States, Proc. Natl. Acad. Sci. U. S. A., 112, 37-42, 2015.

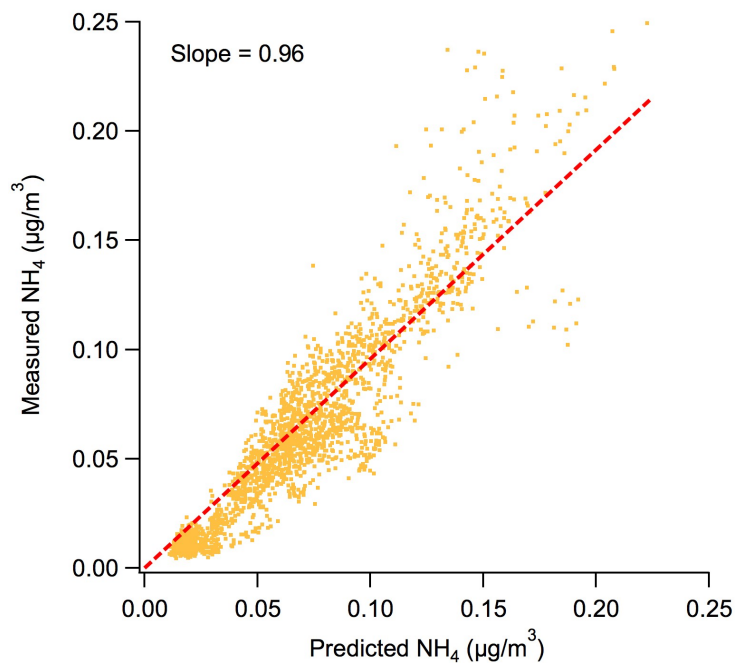

Figure S13: Correlation between mass loadings of ammonium measured by the HR-ToF-AMS and predicted by sulfate mass ( $R^2 = 0.69$ , slope = 0.96) for the whole period. Note that organic nitrate dominated the measured nitrate mass as demonstrated in Section 3.4 of the main text, and thus the measured nitrate mass is not included in the prediction.
